# Supplementary material for: Polyurethane Degradable Hydrogels Based on Cyclodextrin-Oligocaprolactone Derivatives
Source: MDPI journal article supplement (doi:10.3390/gels9090755), 2023-09-16
Supplement: s1 [file s1]

# Supplementary Materials: Polyurethane Degradable Hydrogels Based on Cyclodextrin-Oligocaprolactone Derivatives

Alexandra-Diana Diaconu <sup>1</sup>, Corina-Lenuta Logigan <sup>2</sup>, Catalina Anisoara Peptu <sup>2</sup>, Constanta Ibanescu <sup>2</sup>, Valeria Harabagiu <sup>1</sup> and Cristian Peptu <sup>1,\*</sup>

<sup>1</sup> “Petru Poni” Institute of Macromolecular Chemistry, Aleea Grigore Ghica Voda 41A, 700487 Iasi, Romania; diaconu.diana@icmpp.ro (A.-D.D.); hvaleria@icmpp.ro (V.H.)

<sup>2</sup> Department of Natural and Synthetic Polymers, Faculty of Chemical Engineering and Environmental Protection, “Gheorghe Asachi” Technical University of Iasi, 71, Prof. Dr. Docent Dimitrie Mangeron Street, 700050 Iasi, Romania; savincorina@yahoo.com (C.-L.L.); catipeptu@yahoo.co.uk (C.A.P.); cibanescu@tuiasi.ro (C.I.)

\* Correspondence: cristian.peptu@icmpp.ro

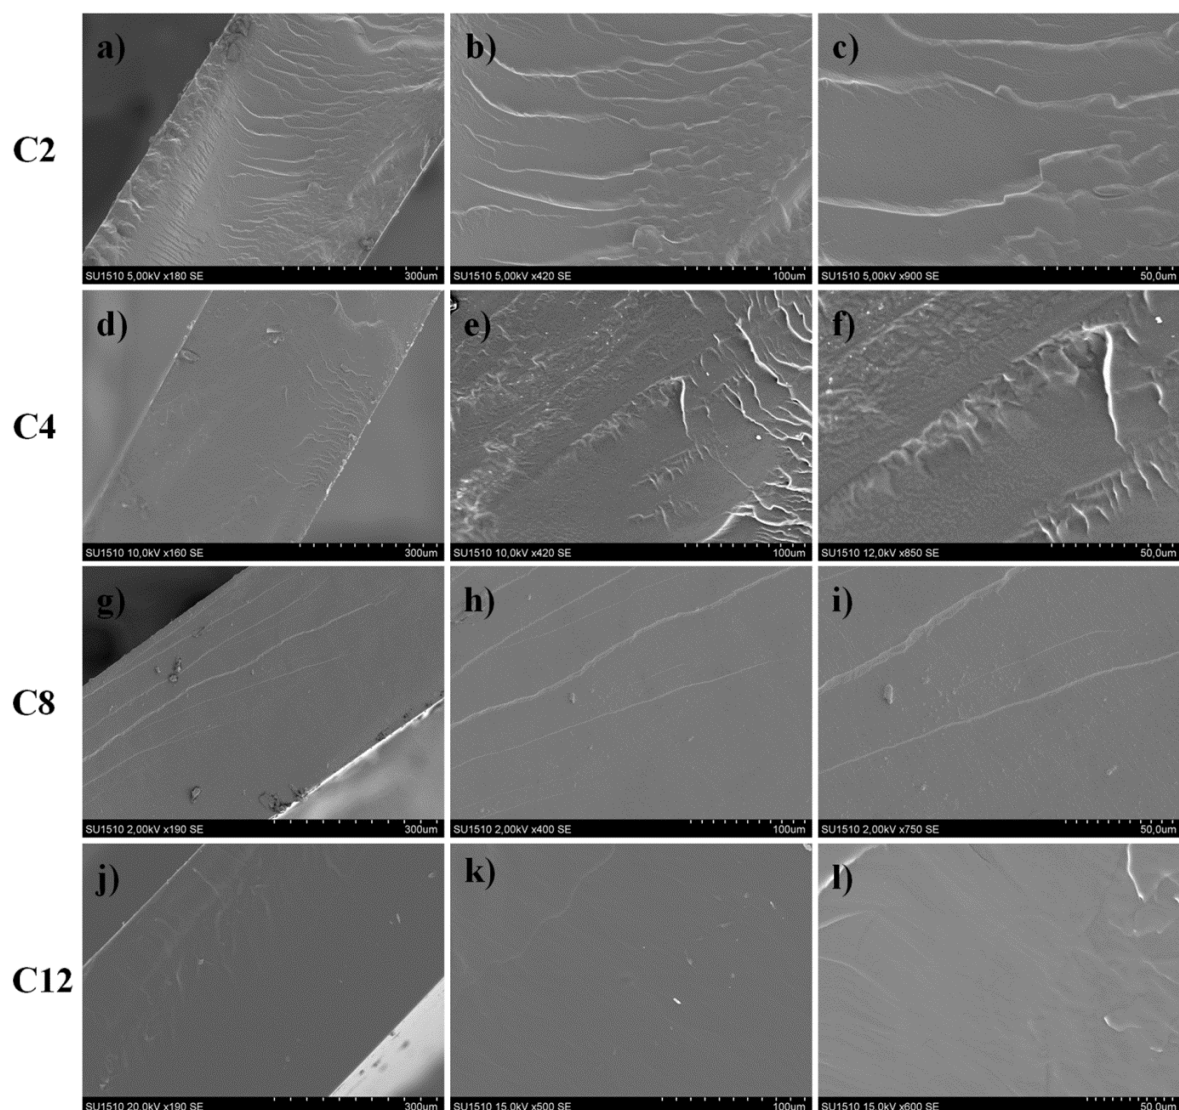

**Figure S1.** SEM micrographs, cross-section view of the hydrogels at different magnifications

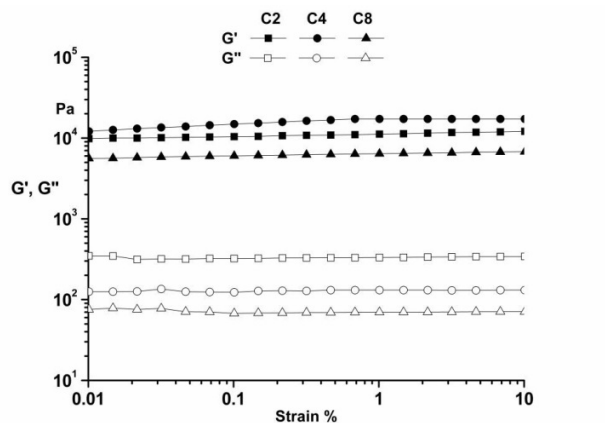

**Figure S2.** Amplitude sweep test performed for the CDCL-PEG hydrogel samples swollen in DMF

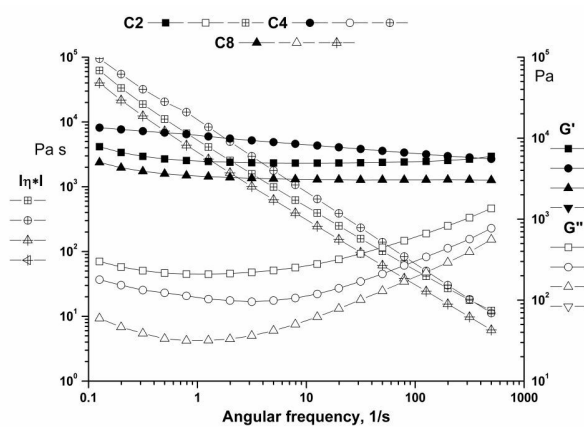

**Figure S3.** Frequency sweep test performed for the CDCL-PEG hydrogel samples swollen in DMF

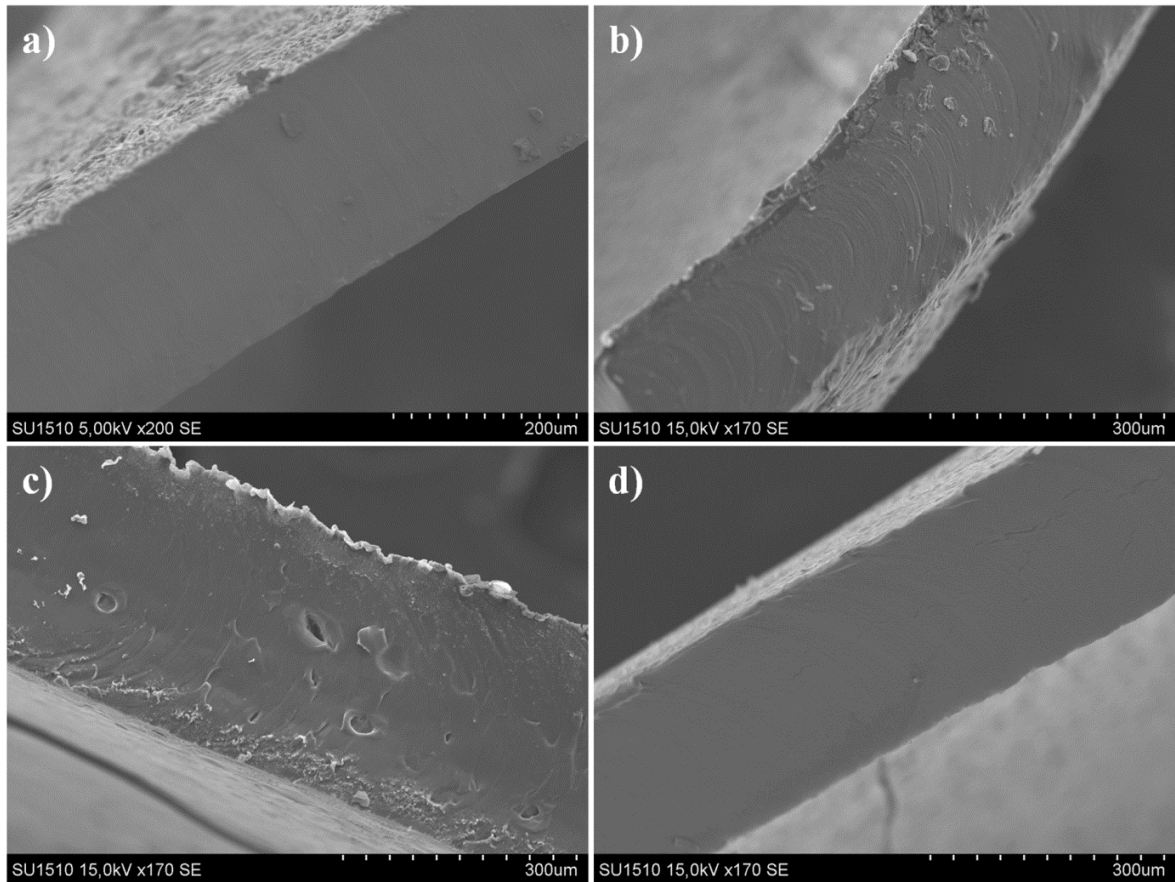

**Figure S4.** Micrographs of C4 sample, section view, after a) 1 day, b) 3 days, c) 5 days, and d) 10 days of degradation

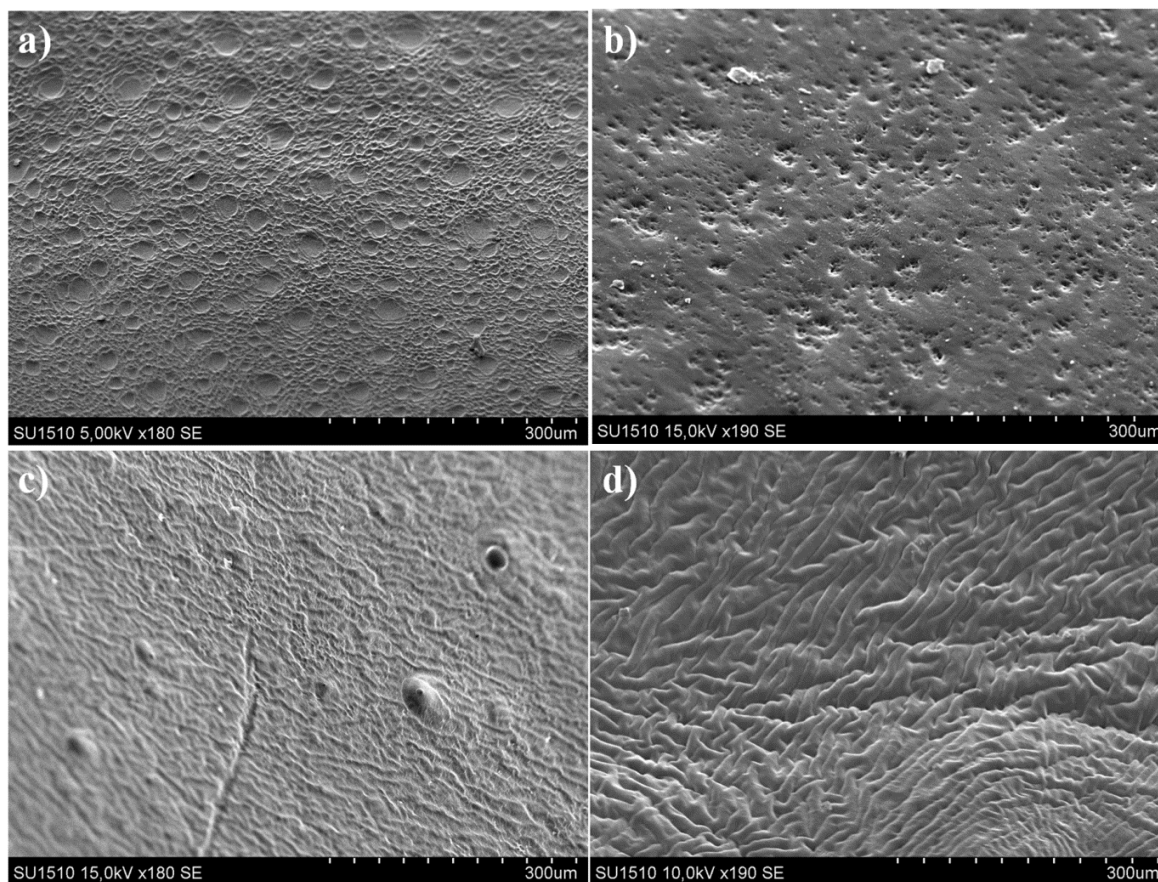

**Figure S5.** Surface micrographs of the C8 sample after a) 1 day, b) 3 days, c) 5 days, and d) after 10 days of degradation

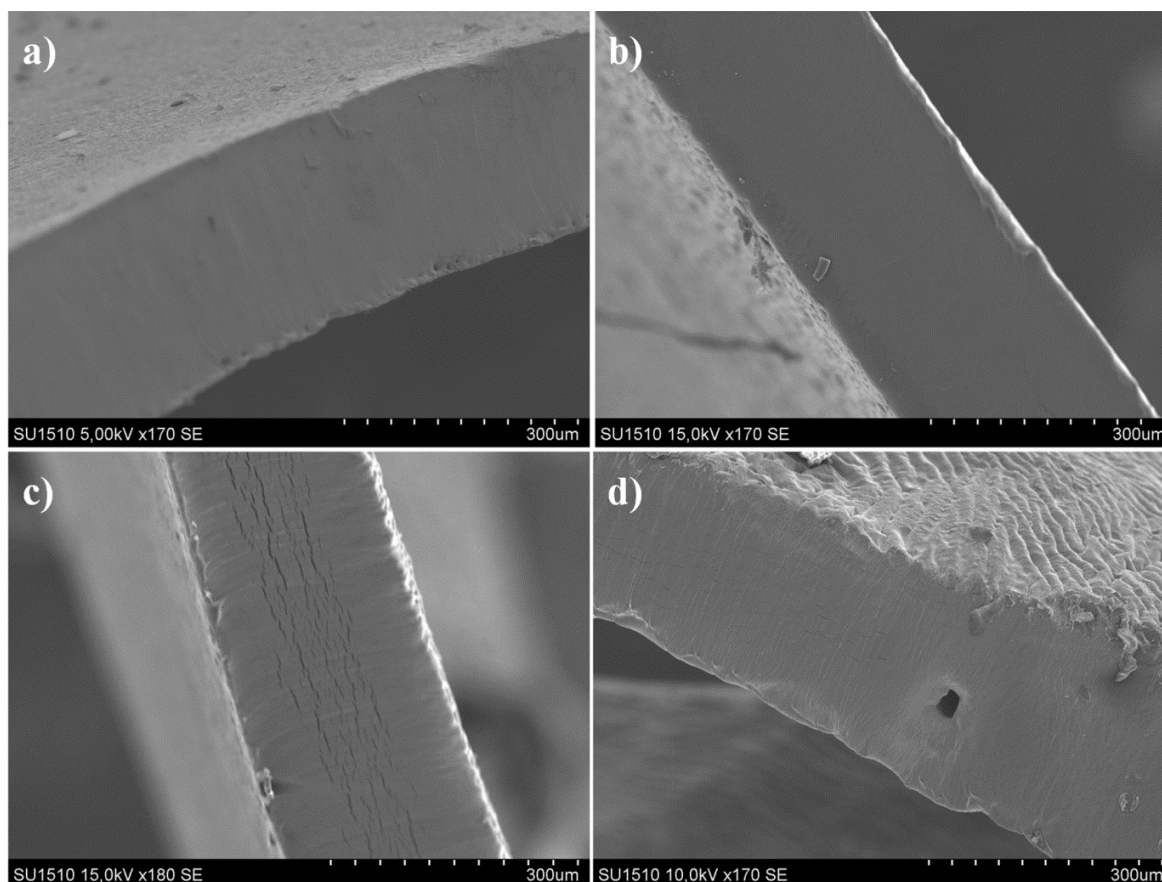

**Figure S6.** Micrographs of C8 sample, section view, after a) 1 day, b) 3 days, c) 5 days, and d) 10 days of degradation

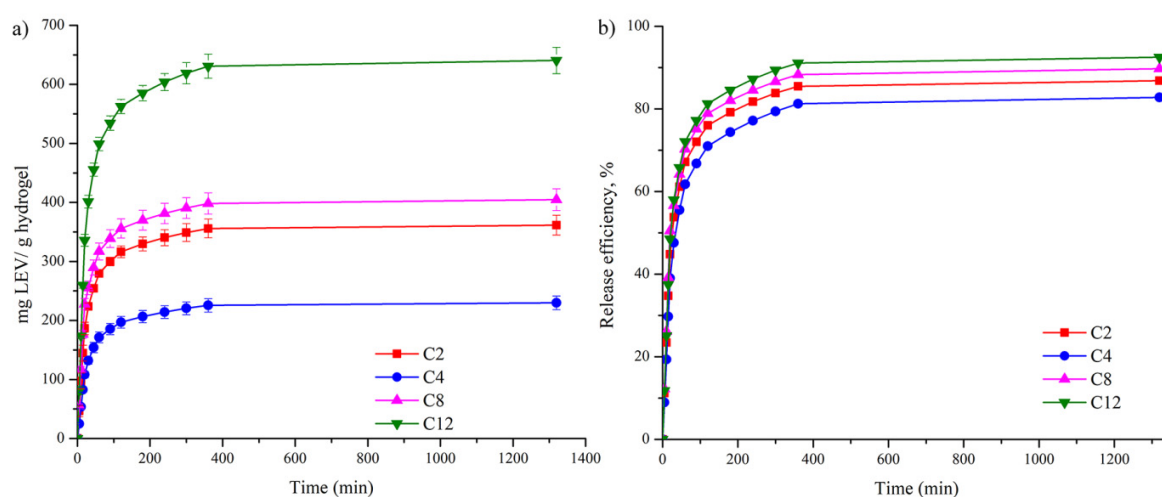

**Figure S7.** The drug release profiles of the hydrogels: a) the levofloxacin released amounts and b) the release efficiency after 24h

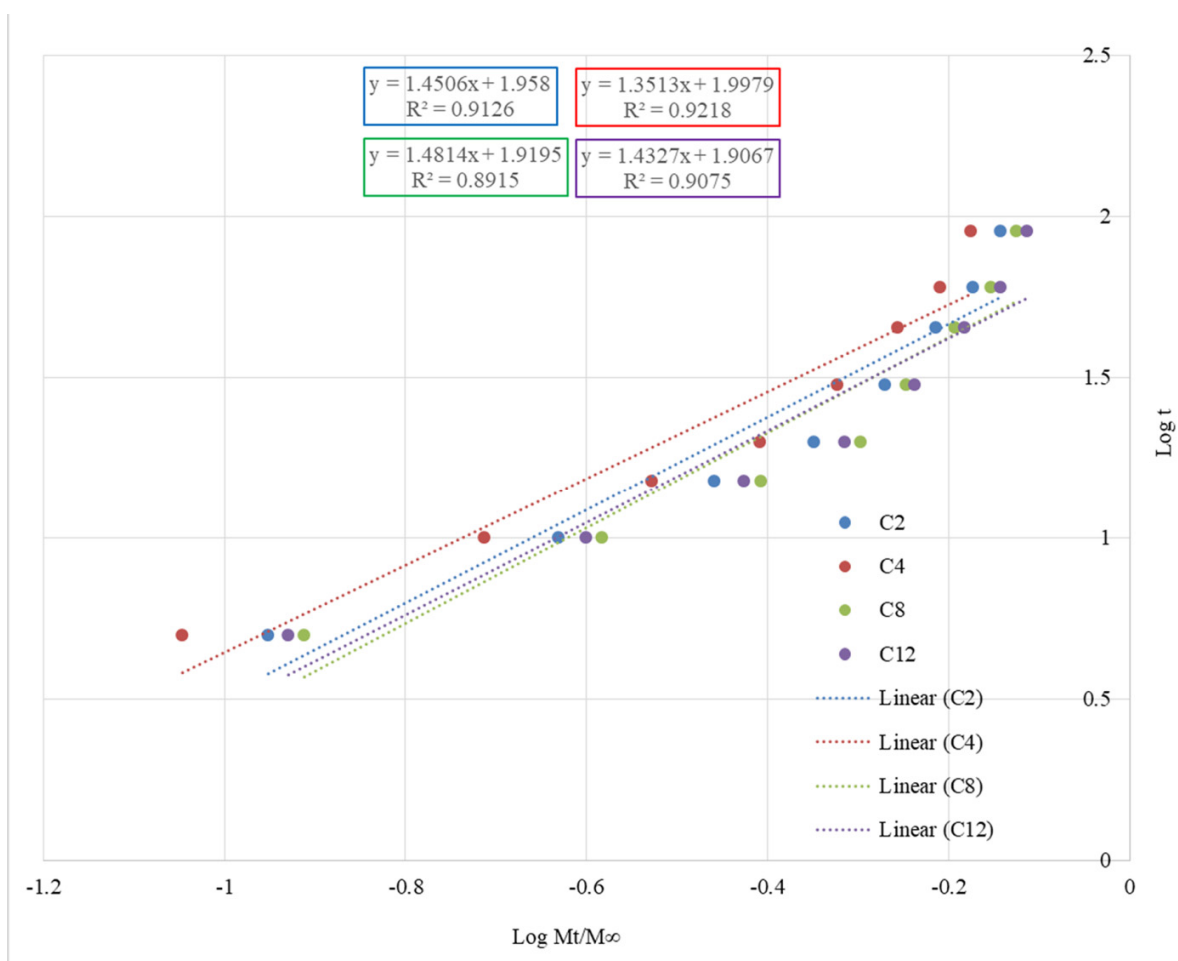

**Figure S8.** Korsmeyer-Peppas model plot for C2, C4, C8 and C12 samples

**Table S1.** Degradation data from TG and DTG curves

| #Sample | Degradation range (°C) |               | Peak (°C) | weight loss (%) |
|---------|------------------------|---------------|-----------|-----------------|
| CDCL    | Step 1                 | 264.84-311.55 | 304.19    | 11.063          |
|         | Step 2                 | 314.25-420.09 | 361.07    | 90.821          |
| C2      | Step 1                 | 306.73-348.66 | 332.24    | 8.253           |
|         | Step 2                 | 348.66-393.29 | 369.76    | 29.143          |
|         | Step 3                 | 395.61-459.23 | 425.12    | 93.09           |
| C4      | Step 1                 | 300.55-343.16 | 336.53    | 7.8             |
|         | Step 2                 | 343.79-379.72 | 355.19    | 21.507          |
|         | Step 3                 | 381.62-468.58 | 424.97    | 96.19           |
| C8      | Step 1                 | 303.3-343.83  | 334.2     | 8.125           |
|         | Step 2                 | 343.84-375.42 | 353.13    | 20.44           |

|            |        |               |        |        |
|------------|--------|---------------|--------|--------|
|            | Step 3 | 376.4-456.52  | 419.47 | 97.413 |
| <b>C12</b> | Step 1 | 304.69-343.85 | 320.95 | 9.802  |
|            | Step 2 | 344.41-372.01 | 360.08 | 20.268 |
|            | Step 3 | 375.84-456.71 | 420.96 | 98.093 |

**Table S2.** The calculated time test parameters for hydrogels

| Sample | $t_{\text{sol-gel}}$ (min) | $G'=G''$ (Pa) | $\ln^*1$ (Pa·s) |
|--------|----------------------------|---------------|-----------------|
| C2     | 53.85                      | 2.645         | 0.3783          |
| C4     | 46.61                      | 5.079         | 0.7181          |
| C8     | 32.03                      | 9.924         | 1.403           |

**Table S3.** The limits of the linear viscoelastic range ( $\gamma_{\text{LVE}}$ ) and  $\Delta G$  for hydrogels

| Sample | $\gamma_{\text{LVE}}$ (%) | $\Delta G = G'-G''$ (Pa) |
|--------|---------------------------|--------------------------|
| C2     | 5                         | 10706                    |
| C4     | 5                         | 17075                    |
| C8     | 5                         | 6282                     |

**Table S4.** DSC data for CDCL-PEG hydrogels

| #Sample    | $T_g$ (°C) | $T_{cr}$ (°C) | $T_{\text{melt}}$ (°C) |
|------------|------------|---------------|------------------------|
| <b>C2</b>  | -50.3      | -             | 22.32                  |
| <b>C4</b>  | -51.44     | -19.77        | 27.91                  |
| <b>C8</b>  | -52.97     | -27.19        | 32.63                  |
| <b>C12</b> | -53.64     | -29.18        | 34.96                  |

**Table S5.** The theoretical content of the hydrogels according to synthesis feed *vs.* residual weight after hydrolytic degradation

| # Sample   | CDCL/<br>PEG-(NCO) <sub>2</sub><br>molar ratio | Content, % wt |       |      | R.W. % |       |       |       |
|------------|------------------------------------------------|---------------|-------|------|--------|-------|-------|-------|
|            |                                                | PEG-<br>IPDI  | CD    | CL   | day    |       |       |       |
|            |                                                |               |       |      | 1      | 3     | 5     | 10    |
| <b>C2</b>  | 1:2                                            | 75.31         | 17.28 | 7.41 | 62.56  | 0     | 0     | 0     |
| <b>C4</b>  | 1:4                                            | 85.92         | 9.86  | 4.23 | 80.31  | 78.24 | 72.35 | 68.08 |
| <b>C8</b>  | 1:8                                            | 92.42         | 5.30  | 2.27 | 87.06  | 84.76 | 83.01 | 78.42 |
| <b>C12</b> | 1:12                                           | 94.82         | 3.63  | 1.55 | 93.01  | 89.79 | 87.74 | 82.76 |



**Table S6.** Levofloxacin loading and release

|                              | <b>C2</b> | <b>C4</b> | <b>C8</b> | <b>C12</b> |
|------------------------------|-----------|-----------|-----------|------------|
| <b>LEV loaded amount, mg</b> | 12.49     | 8.33      | 13.53     | 20.77      |
| <b>LEV – released, mg/g</b>  | 361.5     | 229.8     | 404.7     | 640.6      |
| <b>LEV-released, %</b>       | 86.9      | 82.7      | 89.7      | 92.5       |
